# Supplementary material
Source: publisher site journal article supplement (https://www.dovepress.com/article/422917)
Supplement: Supplementary file 1 [file get_supplementary_file.php]

## Supplementary Materials

Table S1 Basic characteristics of the enrolled subjects based on sex.

|                          | Male            |              |        | Female          |             |        |
|--------------------------|-----------------|--------------|--------|-----------------|-------------|--------|
|                          | Control(N=1280) | Case(N=3714) | P      | Control(N=1519) | Case(N=621) | P      |
| Age (years)              | 52±7            | 44±12        | <0.001 | 52±7            | 53±12       | 0.066  |
| Height (m)               | 1.69±0.06       | 1.72±0.06    | <0.001 | 1.59±0.06       | 1.60±0.05   | <0.001 |
| Weight (Kg)              | 71.4±10.5       | 83.1±13.0    | <0.001 | 60.2±9.5        | 71.8±15.7   | <0.001 |
| BMI (Kg/m <sup>2</sup> ) | 24.9±3.2        | 27.8±3.7     | <0.001 | 24.0±3.5        | 28.0±5.5    | <0.001 |
| WC (cm)                  | 87.5±9.4        | 99.8±9.8     | <0.001 | 80.2±9.7        | 96.7±13.6   | <0.001 |
| HC, (cm)                 | 95.2±7.0        | 103.2±7.4    | <0.001 | 93.8±7.6        | 103.6±11.3  | <0.001 |
| WHR                      | 0.92±0.06       | 0.97±0.05    | <0.001 | 0.85±0.06       | 0.93±0.07   | <0.001 |
| FBG (mmol/L)             | 5.75±1.78       | 5.65±1.24    | <0.001 | 5.38±1.30       | 5.94±1.60   | <0.001 |
| FIN (uU/ml)              | 10.42±7.26      | 15.15±12.83  | <0.001 | 10.54±6.01      | 15.42±11.57 | <0.001 |
| TC (mmol/L)              | 5.17±1.03       | 4.88±0.98    | 0.01   | 5.41±1.57       | 4.98±1.11   | <0.001 |
| TG (mmol/L)              | 2.11±2.00       | 2.27±1.99    | <0.001 | 1.57±1.23       | 1.97±1.64   | <0.001 |
| HDL-C (mmol/L)           | 1.26±0.32       | 1.02±0.22    | <0.001 | 1.49±0.38       | 1.18±0.28   | <0.001 |
| LDL-C (mmol/L)           | 3.01±1.03       | 3.01±0.81    | 0.072  | 2.93±1.00       | 3.03±0.91   | 0.032  |
| AHI                      | -               | 50.2±21.2    | -      |                 | 43.7±23.0   | -      |
| ODI                      | -               | 49.1±25.1    | -      |                 | 44.8±26.4   | -      |
| MAI                      | -               | 32.9±25.5    | -      |                 | 25.7±23.8   | -      |

The data are presented as means and standard deviation and categorical data as the number (percentage). Differences in the baseline characteristics between the two groups were examined using t-test.

BMI, body mass index; WC, waist circumference; HC, hip circumference; WHR, waist/hip ratio; FBG: fasting blood glucose; FIN: fasting serum insulin; TC, total cholesterol; TG, triglyceride; HDL-C, high-density lipoprotein cholesterol; LDL-C, low-density lipoprotein; cholesterol; AHI, apnoea–hypopnea index; ODI, oxygen desaturation index; MAI, micro-arousal index.



Table S3 the linear associations between WHR SNPs with sleep apnea related characteristics of OSA

| SNP        | WHR       |          | AHI     |        | ODI     |        | MAI      |         | TC        |        | TG        |          | HDL       |         | LDL      |         | FBP       |         | FIN      |          |
|------------|-----------|----------|---------|--------|---------|--------|----------|---------|-----------|--------|-----------|----------|-----------|---------|----------|---------|-----------|---------|----------|----------|
|            | $\beta$   | P        | $\beta$ | P      | $\beta$ | P      | $\beta$  | P       | $\beta$   | P      | $\beta$   | P        | $\beta$   | P       | $\beta$  | P       | $\beta$   | P       | $\beta$  | P        |
| rs984222   | -0.003521 | 0.001431 | 0.01966 | 0.965  | -0.4245 | 0.3882 | -0.1371  | 0.791   | -0.006987 | 0.7553 | -0.0486   | 0.252    | -0.000556 | 0.9124  | 0.009446 | 0.6043  | 0.002497  | 0.9268  | 0.0266   | 0.9015   |
| rs4846567  | 0.001765  | 0.1372   | -0.5265 | 0.2749 | -0.4227 | 0.425  | 1.083    | 0.05154 | 0.02849   | 0.2374 | 0.1062    | 0.01976  | -0.006386 | 0.2392  | -0.00082 | 0.9666  | 0.01855   | 0.5265  | -0.6104  | 0.007979 |
| rs10195252 | -0.000708 | 0.697    | -0.2096 | 0.7764 | -0.3222 | 0.6917 | -0.3876  | 0.648   | 0.02413   | 0.5147 | 0.03565   | 0.611    | 0.006138  | 0.4612  | -0.01416 | 0.6383  | -0.02247  | 0.6179  | -0.6156  | 0.0818   |
| rs6905288  | 0.00045   | 0.7142   | 0.09934 | 0.8421 | 0.3767  | 0.4908 | 0.3568   | 0.531   | 0.009599  | 0.7001 | -0.13     | 0.005804 | 0.0197    | 0.00042 | 0.03624  | 0.07384 | -0.01275  | 0.6737  | -0.07714 | 0.7459   |
| rs6931262  | 0.000818  | 0.5449   | 0.06775 | 0.9017 | 0.07246 | 0.9039 | -0.4281  | 0.4986  | 0.01322   | 0.6289 | -0.01969  | 0.7039   | -0.004498 | 0.4643  | 0.04348  | 0.05071 | 0.01268   | 0.7042  | 0.1492   | 0.5681   |
| rs1055144  | 0.000853  | 0.4332   | -0.2929 | 0.5073 | -0.3591 | 0.4607 | -0.3176  | 0.5351  | 0.02379   | 0.282  | -0.03187  | 0.4461   | 0.005045  | 0.3108  | 0.03224  | 0.07311 | -0.013    | 0.6288  | 0.5001   | 0.01804  |
| rs12679556 | 0.00159   | 0.206    | -0.4797 | 0.3479 | -0.3623 | 0.5184 | 0.03083  | 0.9587  | 0.01017   | 0.69   | -0.04618  | 0.3396   | 0.004386  | 0.4448  | 0.006259 | 0.7624  | -0.06677  | 0.03104 | -0.06677 | 0.785    |
| rs10991437 | 0.001122  | 0.3169   | 0.3215  | 0.48   | 0.5525  | 0.2696 | 0.8302   | 0.1152  | 0.02046   | 0.3687 | 0.05674   | 0.1876   | -0.001031 | 0.8406  | 0.003643 | 0.8441  | -0.000263 | 0.9924  | 0.2      | 0.3586   |
| rs7917772  | 0.000605  | 0.572    | -0.6906 | 0.1116 | -0.4332 | 0.3638 | -0.05732 | 0.9089  | 0.03003   | 0.1674 | -0.004144 | 0.9197   | 0.000325  | 0.9471  | 0.01675  | 0.3435  | 0.02581   | 0.3243  | 0.02831  | 0.8913   |
| rs2925979  | 0.000749  | 0.4929   | -0.3648 | 0.4102 | -0.1658 | 0.7336 | 0.1684   | 0.7435  | -0.0222   | 0.3142 | 0.02494   | 0.551    | -0.005891 | 0.2372  | -0.02424 | 0.1761  | -0.03927  | 0.1439  | -0.4251  | 0.04466  |
| rs224333   | -0.001426 | 0.246    | -0.1467 | 0.7684 | -0.293  | 0.5916 | 0.8694   | 0.1299  | -0.01627  | 0.5121 | 0.0522    | 0.269    | -0.009057 | 0.1052  | -0.01875 | 0.3523  | 0.04017   | 0.1808  | -0.4745  | 0.04677  |

adjust for age sex BMI

Table S4 the correlations between GRS with clinical characteristics of all subjects

|       | BMI GRS   |                      | WHR GRS      |                       |
|-------|-----------|----------------------|--------------|-----------------------|
|       | $\beta^*$ | P*                   | $\beta^{\#}$ | P <sup>#</sup>        |
| BMI   | 0.055     | $2.7 \times 10^{-5}$ | -            | -                     |
| WHR   | -         | -                    | 0.017        | $1.96 \times 10^{-5}$ |
| FBG   | 0.006     | 0.189                | 0.013        | 0.089                 |
| FIN   | 0.071     | 0.045                | 0.1          | 0.071                 |
| TC    | 0.003     | 0.402                | 0.001        | 0.859                 |
| TG    | -0.004    | 0.46                 | 0.026        | 0.011                 |
| HDL-C | 0.001     | 0.4                  | -0.006       | 0.000217              |
| LDL-C | -0.001    | 0.679                | 0.002        | 0.675                 |

\* adjust for age sex

# adjust for age sex BMI

Table S5 The MR-egger result of MR

| Method           | Estimate | Std Error | L95%     | U95%    | P-value |
|------------------|----------|-----------|----------|---------|---------|
| BMI SNPs and OSA |          |           |          |         |         |
| Simple median    | 0.214    | 0.091     | 0.035    | 0.393   | 0.019   |
| IVW              | 0.198    | 0.055     | 0.091    | 0.305   | <0.001  |
| MR-Egger         | 0.195    | 0.096     | 0.007    | 0.383   | 0.042   |
| intercept        | 0.001    | 0.018     | -0.034   | 0.036   | 0.965   |
| BMI SNPs and AHI |          |           |          |         |         |
| Simple median    | 0.915    | 1.043     | -1.130   | 2.960   | 0.380   |
| IVW              | 0.656    | 0.561     | -0.443   | 1.755   | 0.242   |
| MR-Egger         | 0.847    | 0.943     | -1.001   | 2.695   | 0.369   |
| intercept        | -0.043   | 0.169     | -0.374   | 0.289   | 0.801   |
| BMI SNPs and ODI |          |           |          |         |         |
| Simple median    | 2.214    | 1.171     | -0.081   | 4.508   | 0.059   |
| IVW              | 1.931    | 0.629     | 0.698    | 3.163   | 0.002   |
| MR-Egger         | 2.000    | 1.069     | -0.095   | 4.096   | 0.061   |
| intercept        | -0.016   | 0.192     | -0.0391  | 0.360   | 0.935   |
| BMI SNPs and MAI |          |           |          |         |         |
| Simple median    | 0.784    | 1.271     | -1.707   | 3.275   | 0.537   |
| IVW              | 0.661    | 0.720     | -0.750   | 2.072   | 0.358   |
| MR-Egger         | 1.291    | 1.223     | -1.107   | 3.689   | 0.291   |
| intercept        | -0.140   | 0.219     | 0.569    | 0.288   | 0.522   |
| WHR SNPs and AHI |          |           |          |         |         |
| Simple median    | -5.584   | 164.572   | -328.138 | 316.971 | 0.973   |
| IVW              | -79.957  | 94.609    | -265.388 | 105.474 | 0.398   |
| MR-Egger         | 38.850   | 167.771   | -289.974 | 367.675 | 0.817   |
| intercept        | -0.223   | 0.260     | -0.731   | 0.286   | 0.391   |
| WHR SNPs and ODI |          |           |          |         |         |
| Simple median    | 88.549   | 181.826   | -267.823 | 444.922 | 0.626   |
| IVW              | 39.684   | 103.953   | -164.061 | 243.429 | 0.703   |
| MR-Egger         | 119.733  | 184.363   | -241.611 | 481.078 | 0.516   |
| intercept        | -0.150   | 0.285     | -0.709   | 0.409   | 0.599   |
| WHR SNPs and MAI |          |           |          |         |         |
| Simple median    | 38.938   | 206.346   | -365.493 | 443.368 | 0.850   |
| IVW              | 83.952   | 109.385   | -130.439 | 298.342 | 0.443   |
| MR-Egger         | 61.513   | 200.059   | -330.594 | 453.621 | 0.758   |
| intercept        | 0.042    | 0.309     | -0.564   | 0.648   | 0.892   |

CI, confidence interval; IVW, inverse-variance weighted; L95%, lower bound of the 95% CI; U95%, upper bound of the 95% CI; SNP, single-nucleotide polymorphism.

Table S6 The power calculations of MR

|        |                 | Power | NCP    | F-statistic |
|--------|-----------------|-------|--------|-------------|
| Total  | BMI GRS and OSA | 1.00  | 27.39  | 554.50      |
|        | BMI GRS and AHI | 1.00  | 67.76  | 229.23      |
|        | BMI GRS and ODI | 1.00  | 127.68 | 229.23      |
|        | BMI GRS and MAI | 1.00  | 55.88  | 229.23      |
|        | WHR GRS and OSA | 1.00  | 453.73 | 6201.58     |
|        | WHR GRS and AHI | -     | -      | -           |
|        | WHR GRS and ODI | -     | -      | -           |
|        | WHR GRS and MAI | -     | -      | -           |
| Male   | BMI GRS and OSA | 1.00  | 32.88  | 416.21      |
|        | BMI GRS and AHI | 1.00  | 48.43  | 206.51      |
|        | BMI GRS and ODI | 1.00  | 105.52 | 206.51      |
|        | BMI GRS and MAI | 1.00  | 47.00  | 206.51      |
|        | WHR GRS and OSA | 0.87  | 9.64   | 3206.13     |
|        | WHR GRS and AHI | -     | -      | -           |
|        | WHR GRS and ODI | -     | -      | -           |
|        | WHR GRS and MAI | -     | -      | -           |
| Female | BMI GRS and OSA | -     | -      | -           |
|        | BMI GRS and AHI | 1.00  | 196.63 | 329.34      |
|        | BMI GRS and ODI | 1.00  | 237.56 | 329.34      |
|        | BMI GRS and MAI | 1.00  | 109.11 | 329.34      |
|        | WHR GRS and OSA | 1.00  | 913.24 | 3161.37     |
|        | WHR GRS and AHI | -     | -      | -           |
|        | WHR GRS and ODI | -     | -      | -           |
|        | WHR GRS and MAI | -     | -      | -           |

Power calculations for two-stage least squares Mendelian Randomization studies using a genetic instrument. NCP, Non-Centrality-Parameter; F-statistic: The strength of the instrument.

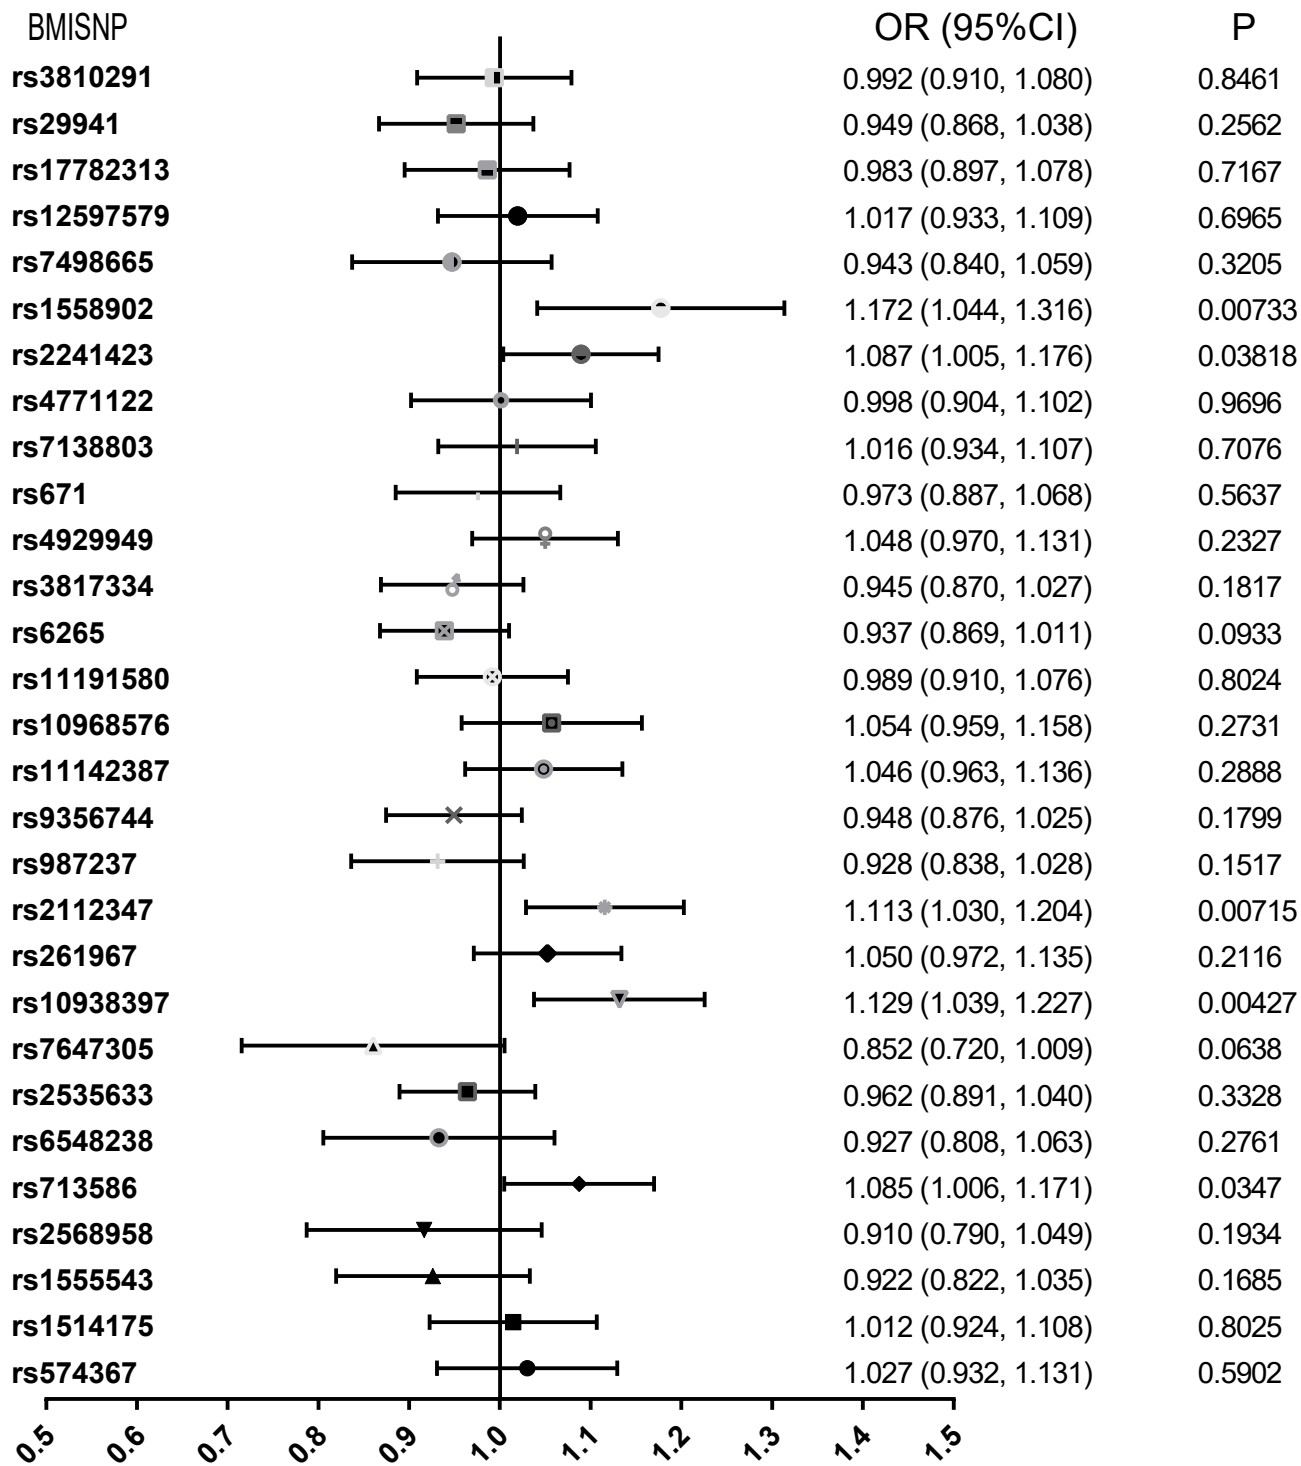

Figures S1 The associations of the BMI-associated SNPs with OSA risk



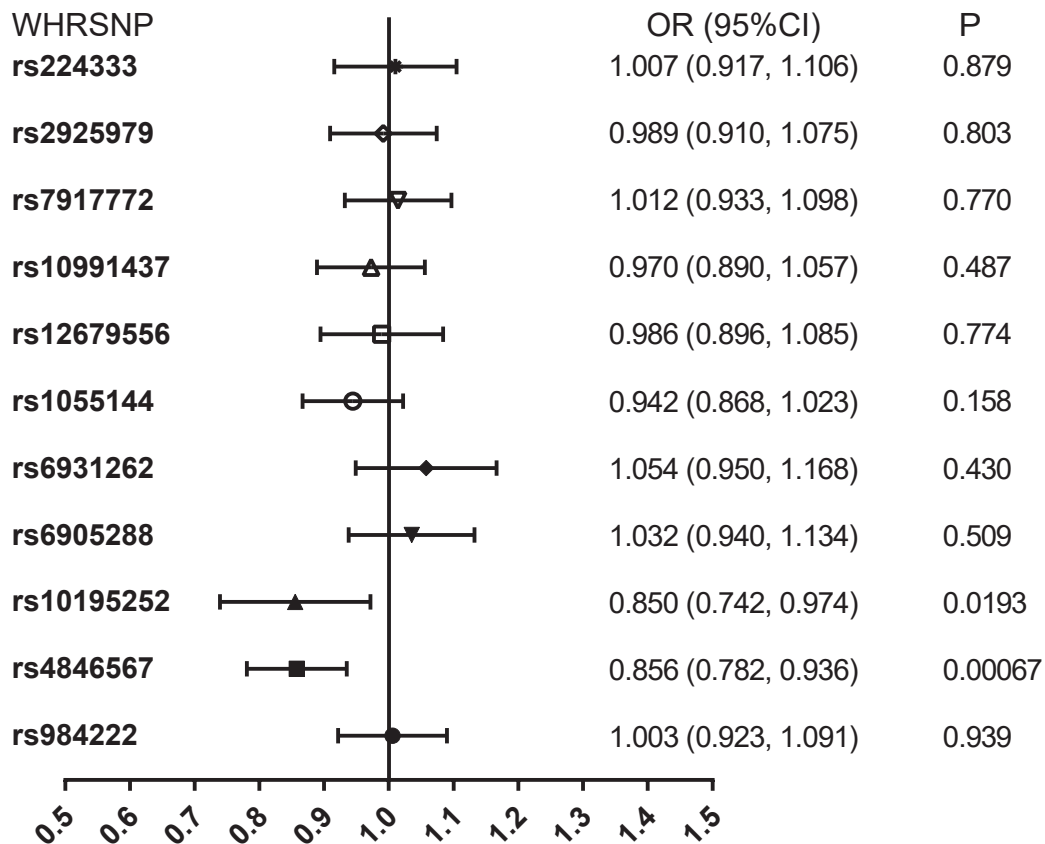

Figures S2 The associations of the WHR-associated SNPs with OSA risk

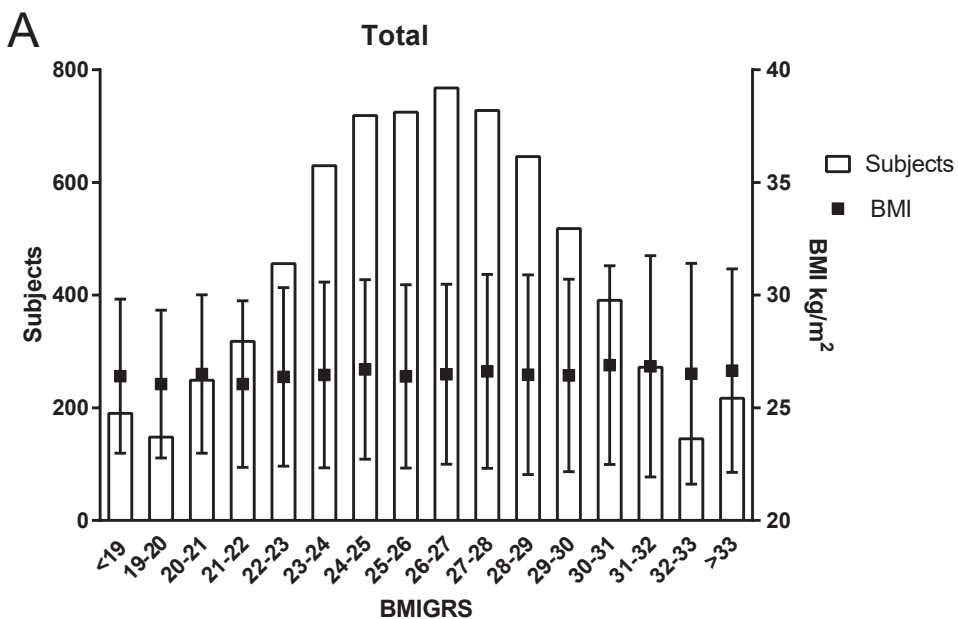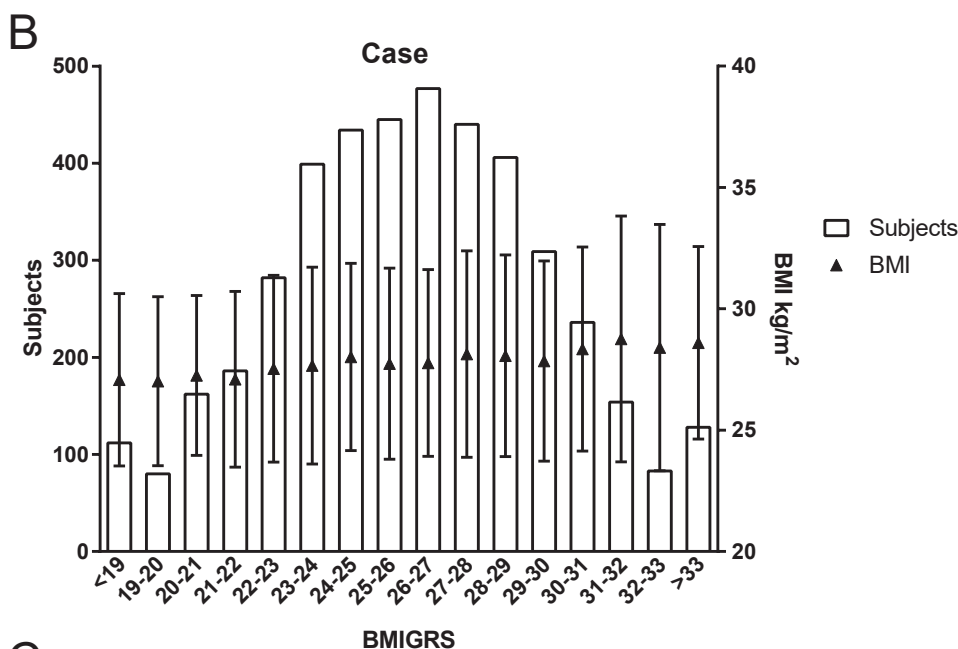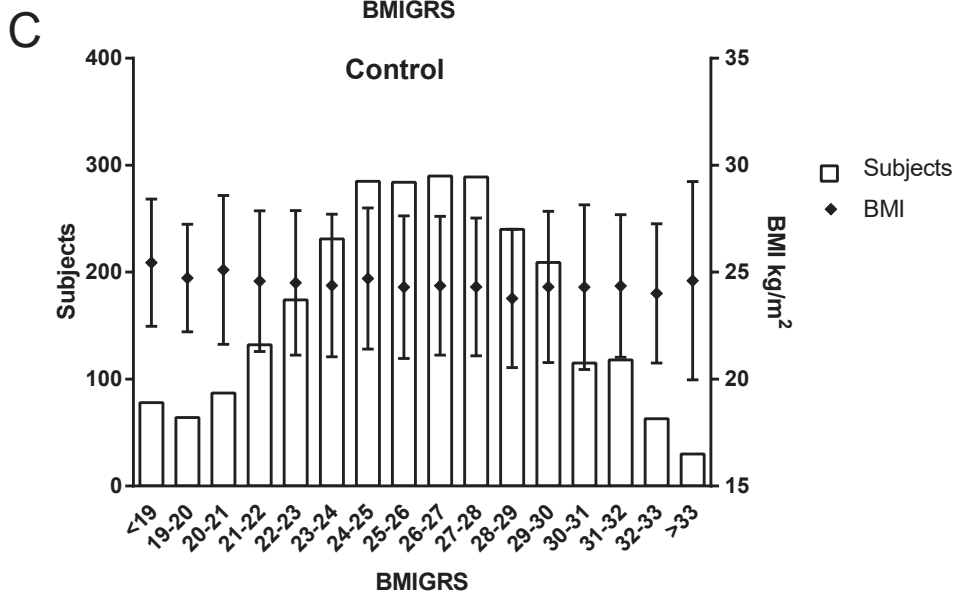

Figures S3 The distributions of BMI and BMI-GRS; Figures S3A The BMI-GRS distribution and its association with BMI in total population; Figures S3B The BMI-GRS distribution and its association with BMI in case group; Figures S3C The BMI-GRS distribution and its association with BMI in control group.

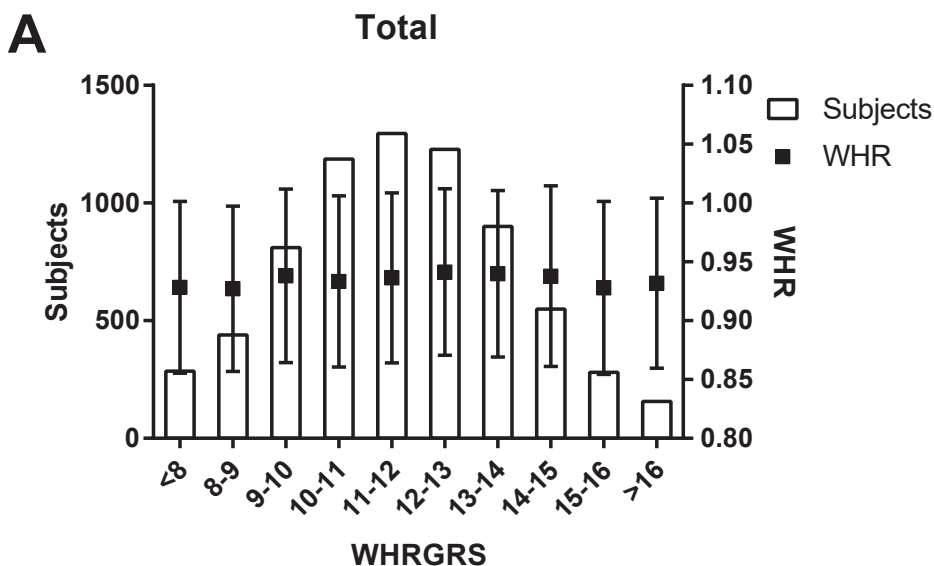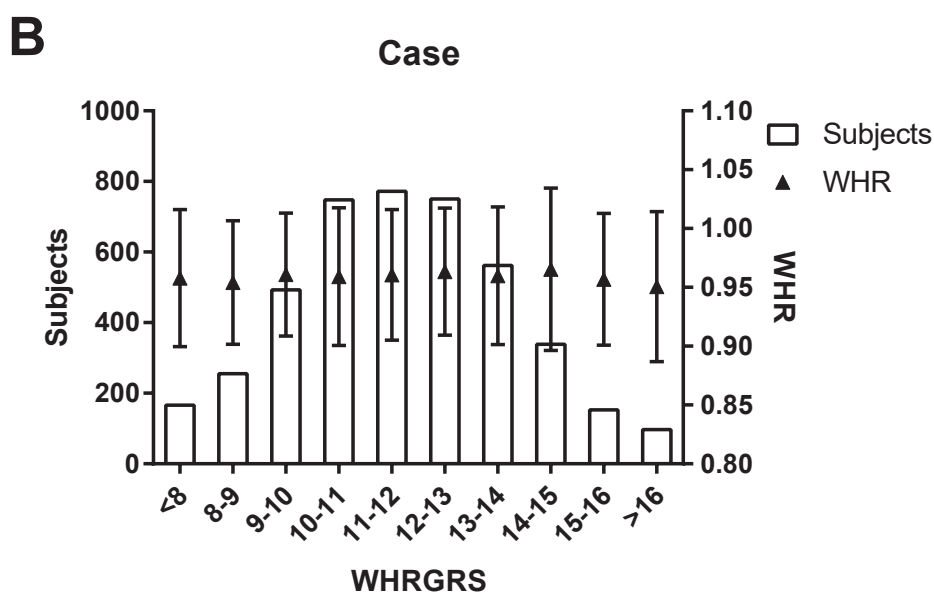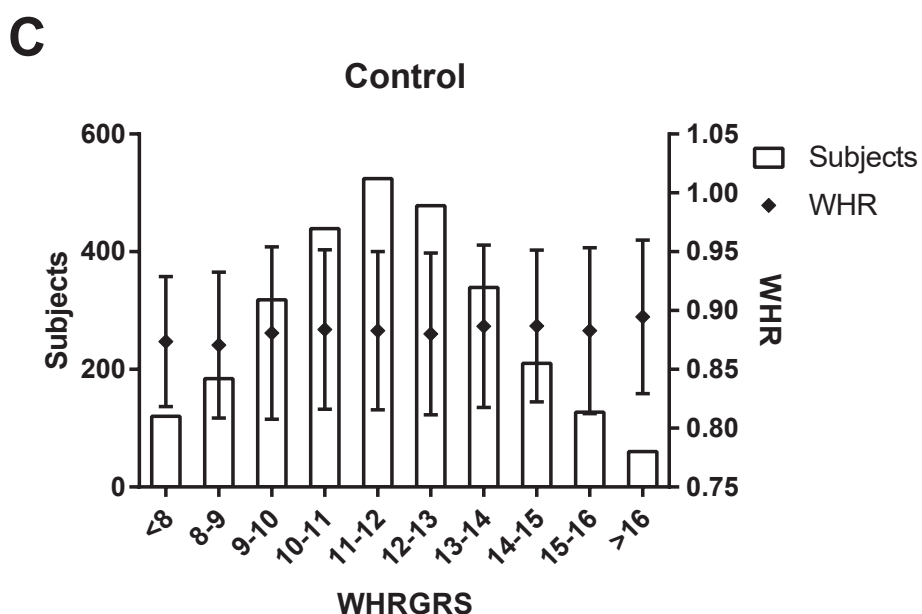

Figures S4 The distributions of WHR and WHR-GRS; Figures S4A The WHR-GRS distribution and its association with WHR in total population; Figures S4B The WHR-GRS distribution and its association with WHR in the case group; Figures S4C The WHR-GRS distribution and its association with WHR in the control group.

### Total

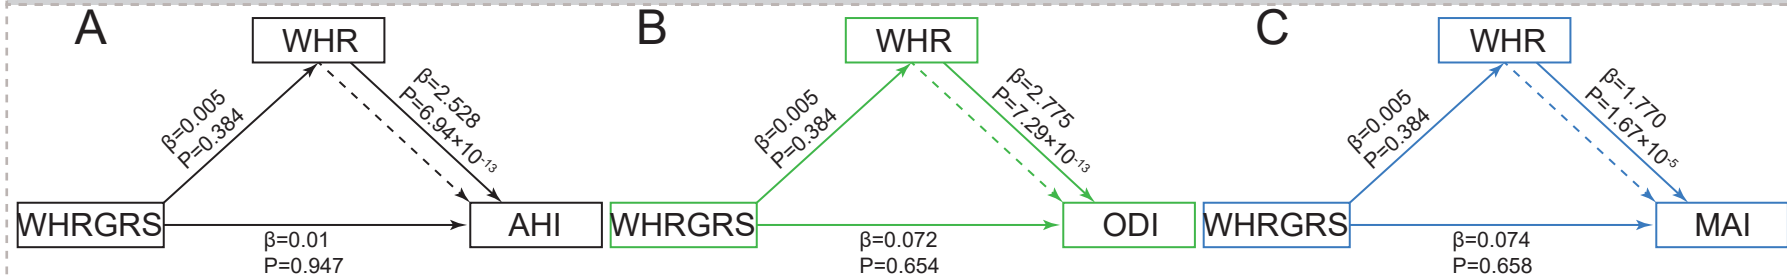

### Male

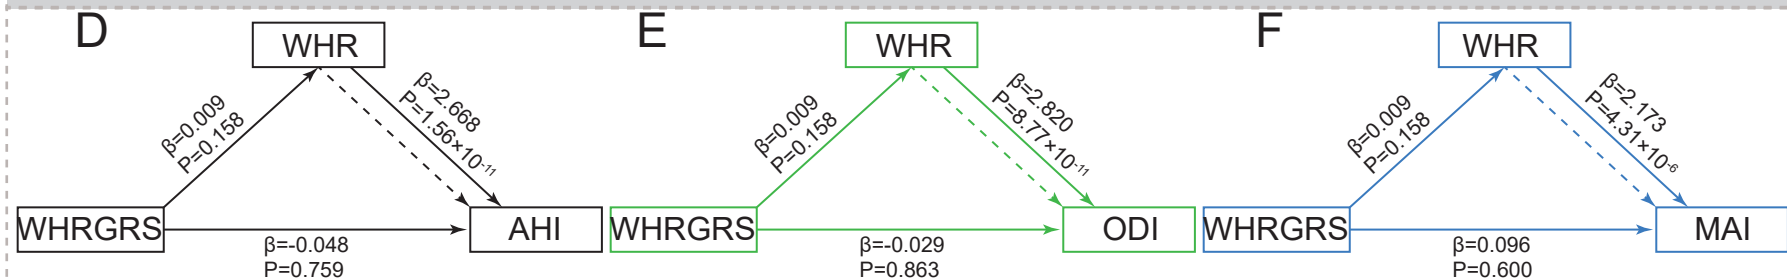

### Female

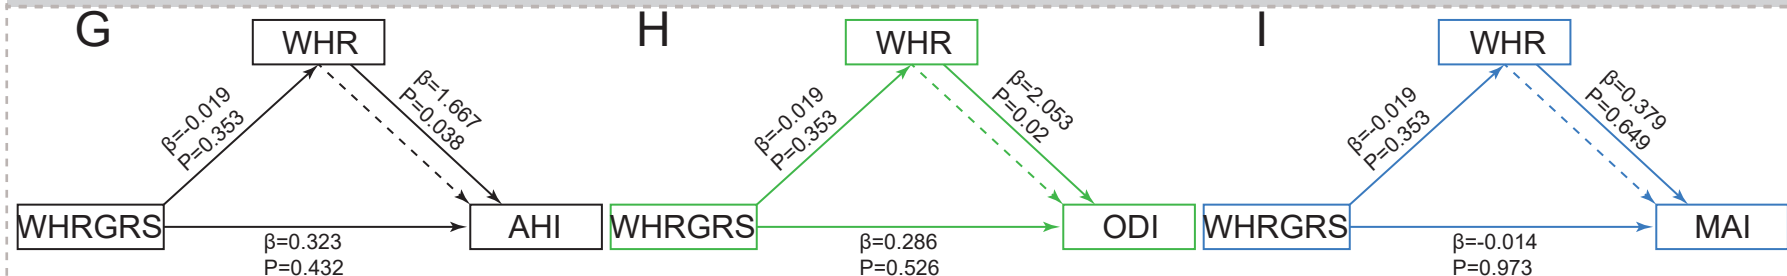

Figures S5 Mendelian randomization analysis for the association of WHR GRS and OSA quantitative traits. Figure S5A WHR GRS and AHI for total population; Figure S5B WHR GRS and ODI for total population; Figure S5C WHR GRS and MAI for total population; Figure S5D WHR GRS and AHI for men; Figure S5E WHR GRS and ODI for men; Figure S5F WHR GRS and MAI for men; Figure S5G WHR GRS and AHI for women; Figure S5H WHR GRS and ODI for women; Figure S5I WHR GRS and MAI for women.
